# Supplementary material for: Potential Anticancer Activity of Crude Ethanol, Ethyl Acetate, and Water Extracts of Ephedra foeminea on Human Osteosarcoma U2OS Cell Viability and Migration
Source: Biomed Res Int. 2020 Jul 9;2020:3837693. doi: 10.1155/2020/3837693 (PMC7368211; doi:10.1155/2020/3837693)
Supplement: Supplementary Materials — Figure S1. U2OS growth curve as determined over a 6-day period. The growth curve exhibited a sigmoid pattern with lag, exponential and statinary phases. Figure S2: Effect of E. foeminea ethyl acetate, ethanol and water extract treatments on U2OS cell morphology. Cells mostly possessed an elliptical shape in which they appeared wider at the center with tapering ends (red circles). Table S1. RT-PCR Forward (F) and Reverse (R) Primer Sequences, Annealing Temperature, Cycle Number and Amplicon Sizes.Table S2. Microarray Dataset Table S3. Summary of MTT assay Pvalues obtained for all extract treatments. Supplementary File 1.Fold change values of genes after doxorubicin treatment. Supplementary File 2.Fold change values of genes after nutlin treatment. [file 3837693.f1.zip › Supplementary File 1..xlsx]

## Sheet: Untreated vs Doxorubicin
Upregulated										Downregulated
P.value	logFC	Gene.symbol	Gene.title							P.value	logFC	Gene.symbol	Gene.title
1.49e-06	3.06314	TP53I3	tumor protein p53 inducible protein 3							7.63e-06	-2.16962	TMBIM4	transmembrane BAX inhibitor motif containing 4
6.83e-06	2.37826	CDIP1	cell death inducing p53 target 1							1.67e-05	-1.98484	TMBIM4	transmembrane BAX inhibitor motif containing 4
9.93e-06	2.76886	CDH9	cadherin 9							2.24e-05	-2.07598	CDH4	cadherin 4
1.11e-05	3.13284	TP53INP1	tumor protein p53 inducible nuclear protein 1							6.56e-05	-1.75536	CDH2	cadherin 2
1.2e-05	2.45527	PIDD1	p53-induced death domain protein 1							0.000158	-1.30445	CDH2	cadherin 2
1.88e-05	2.52459	CDIP1	cell death inducing p53 target 1							0.00019	-1.63223	TMBIM4	transmembrane BAX inhibitor motif containing 4
3.6e-05	2.14587	TWIST2	twist family bHLH transcription factor 2							0.000445	-1.57451	CDH4	cadherin 4
9.16e-05	2.12526	CDH10	cadherin 10							0.00106	-1.54822	CDH18	cadherin 18
9.77e-05	1.49927	DACT1	dishevelled binding antagonist of beta catenin 1							0.00124	-1.09532	TMX2-CTNND1///CTNND1	TMX2-CTNND1 readthrough (NMD candidate)///catenin delta 1
0.000142	1.58642	DACT3	dishevelled binding antagonist of beta catenin 3							0.00147	-3.00453	DCHS2	dachsous cadherin-related 2
0.000214	3.86673	TP53INP1	tumor protein p53 inducible nuclear protein 1							0.00181	-1.08405	TMX2-CTNND1///CTNND1	TMX2-CTNND1 readthrough (NMD candidate)///catenin delta 1
0.000282	1.63212	MIR6513///TMBIM1	microRNA 6513///transmembrane BAX inhibitor motif containing 1							0.00187	-1.66625	DCHS2	dachsous cadherin-related 2
0.000802	1.38553	TP53I11	tumor protein p53 inducible protein 11							0.00208	-0.849723	BIRC5	baculoviral IAP repeat containing 5
0.00103	1.3211	TP53I11	tumor protein p53 inducible protein 11							0.00263	-0.843331	TMX2-CTNND1///CTNND1	TMX2-CTNND1 readthrough (NMD candidate)///catenin delta 1
0.00106	2.19916	PIDD1	p53-induced death domain protein 1							0.00307	-0.959753	FAT4	FAT atypical cadherin 4
0.00243	0.869445	TP53I13	tumor protein p53 inducible protein 13							0.00343	-1.0186	CTNNB1	catenin beta 1
0.00294	0.726875	CELSR2	cadherin EGF LAG seven-pass G-type receptor 2							0.00433	-0.71625	CTNNA1	catenin alpha 1
0.00355	2.82649	TP53AIP1	tumor protein p53 regulated apoptosis inducing protein 1							0.00438	-0.963877	BIRC5	baculoviral IAP repeat containing 5
0.00547	0.576451	TP53INP2	tumor protein p53 inducible nuclear protein 2							0.00593	-0.546489	TP53BP1	tumor protein p53 binding protein 1
0.00655	1.82609	TP53INP1	tumor protein p53 inducible nuclear protein 1							0.00595	-0.672423	TMX2-CTNND1///CTNND1	TMX2-CTNND1 readthrough (NMD candidate)///catenin delta 1
0.00698	2.83473	TWIST1	twist family bHLH transcription factor 1							0.0109	-2.99045	CDH12	cadherin 12
0.0071	0.905143	FAT3	FAT atypical cadherin 3							0.0129	-0.756371	RUNX2	runt related transcription factor 2
0.00981	0.553871	BAX	BCL2 associated X, apoptosis regulator							0.0178	-1.17727	CTNND2	catenin delta 2
0.0107	0.645753	CTNNB1	catenin beta 1							0.0251	-0.483855	CELSR3	cadherin EGF LAG seven-pass G-type receptor 3
0.0107	0.774381	TWIST2	twist family bHLH transcription factor 2							0.0353	-3.09958	SOX2	SRY-box 2
0.0139	2.03319	CELSR1	cadherin EGF LAG seven-pass G-type receptor 1							0.0362	-1.15739	FAT3	FAT atypical cadherin 3
0.015	0.888266	TP53AIP1	tumor protein p53 regulated apoptosis inducing protein 1							0.0365	-0.465317	XIAP	X-linked inhibitor of apoptosis
0.017	1.07758	CDH22	cadherin 22							0.038	-1.22927	TMBIM4	transmembrane BAX inhibitor motif containing 4
0.0174	0.887041	CDHR3	cadherin related family member 3							0.0416	-0.433687	JMY	junction mediating and regulatory protein, p53 cofactor
0.0191	1.1388	RUNX2	runt related transcription factor 2							0.0435	-0.496751	CBY1	chibby family member 1, beta catenin antagonist
0.0194	0.8606	CDHR1	cadherin related family member 1							0.0452	-1.04037	CPED1	cadherin like and PC-esterase domain containing 1
0.0215	0.53454	BAX	BCL2 associated X, apoptosis regulator							0.049	-0.323464	FAT1	FAT atypical cadherin 1
0.0296	1.08579	LOC100653137///CDH23	cadherin-23-like///cadherin-related 23							0.0626	-2.14612	DACT3	dishevelled binding antagonist of beta catenin 3
0.0358	0.60273	CELSR2	cadherin EGF LAG seven-pass G-type receptor 2							0.0634	-1.51411	XAF1	XIAP associated factor 1
0.0447	0.346213	TMBIM6	transmembrane BAX inhibitor motif containing 6							0.0649	-0.426151	XIAP	X-linked inhibitor of apoptosis
0.0701	1.1309	KLLN	killin, p53-regulated DNA replication inhibitor							0.065	-1.85534	CBY1	chibby family member 1, beta catenin antagonist
0.077	0.494818	CDH4	cadherin 4							0.0805	-0.568366	XIAP	X-linked inhibitor of apoptosis
0.0863	0.643081	CDH6	cadherin 6							0.0808	-1.70701	CDHR5	cadherin related family member 5
0.0902	0.939782	CDH3	cadherin 3							0.108	-1.8023	CDH6	cadherin 6
0.0972	0.594235	CDHR1	cadherin related family member 1							0.122	-0.331768	XIAP	X-linked inhibitor of apoptosis
0.109	1.62339	CDH17	cadherin 17							0.147	-1.4409	RUNX2	runt related transcription factor 2
0.123	1.52382	CTNNBIP1	catenin beta interacting protein 1							0.159	-0.470766	MDM4	MDM4, p53 regulator
0.13	1.3264	CDH5	cadherin 5							0.165	-0.315336	SOX2	SRY-box 2
0.143	0.448903	CDHR5	cadherin related family member 5							0.178	-0.419105	MDM4	MDM4, p53 regulator
0.156	0.274403	DCHS1	dachsous cadherin-related 1							0.2	-0.695057	CDH26	cadherin 26
0.158	2.06681	CDH26	cadherin 26							0.211	-0.892325	CDHR3	cadherin related family member 3
0.159	1.01258	RUNX2	runt related transcription factor 2							0.227	-1.09477	CDH6	cadherin 6
0.175	0.26523	MDM4	MDM4, p53 regulator							0.231	-1.2947	CDH7	cadherin 7
0.176	0.644661	CPED1	cadherin like and PC-esterase domain containing 1							0.233	-0.204608	BIRC5	baculoviral IAP repeat containing 5
0.181	0.266833	MMP2	matrix metallopeptidase 2							0.24	-0.172616	CTNNA1	catenin alpha 1
0.183	0.797025	XAF1	XIAP associated factor 1							0.268	-0.434399	CDH7	cadherin 7
0.195	0.345208	VIM	vimentin							0.306	-0.371009	CELSR3	cadherin EGF LAG seven-pass G-type receptor 3
0.2	0.191731	TP53BP2	tumor protein p53 binding protein 2							0.318	-0.155986	VIM	vimentin
0.209	1.44732	LINC-PINT	long intergenic non-protein coding RNA, p53 induced transcript							0.327	-0.201336	TWISTNB	TWIST neighbor
0.222	0.565427	CDH22	cadherin 22							0.339	-0.141037	CTNNA1	catenin alpha 1
0.222	0.518568	CDH8	cadherin 8							0.366	-1.22479	CTNNA3	catenin alpha 3
0.244	0.787206	MMP2	matrix metallopeptidase 2							0.381	-0.244127	TP53BP1	tumor protein p53 binding protein 1
0.252	1.0441	TP53BP1	tumor protein p53 binding protein 1							0.4	-0.404086	MDM4	MDM4, p53 regulator
0.262	0.937414	CDH15	cadherin 15							0.421	-0.779283	DCHS1	dachsous cadherin-related 1
0.291	0.822766	CTNNA1P1	catenin alpha 1 pseudogene 1							0.422	-0.794886	CDH19	cadherin 19
0.313	1.19154	CDH15	cadherin 15							0.422	-0.111347	CTNNA1	catenin alpha 1
0.329	0.291452	LINC-PINT	long intergenic non-protein coding RNA, p53 induced transcript							0.423	-0.178132	TWISTNB	TWIST neighbor
0.329	0.531028	LINC-PINT	long intergenic non-protein coding RNA, p53 induced transcript							0.437	-0.899994	CDH6	cadherin 6
0.332	0.289953	CDH24	cadherin 24							0.459	-0.118257	CDH11	cadherin 11
0.364	0.248945	CDHR2	cadherin related family member 2							0.494	-1.02216	CTNNA2	catenin alpha 2
0.382	0.906622	CTNNA3	catenin alpha 3							0.495	-0.1793	SOX2	SRY-box 2
0.393	0.812364	TP53AIP1	tumor protein p53 regulated apoptosis inducing protein 1							0.534	-0.402201	CDH8	cadherin 8
0.395	0.873049	LOC100653137///CDH23	cadherin-23-like///cadherin-related 23							0.571	-0.727309	LOC100653137///CDH23	cadherin-23-like///cadherin-related 23
0.405	0.246833	CDH1	cadherin 1							0.585	-0.0786921	TMBIM6	transmembrane BAX inhibitor motif containing 6
0.407	0.338368	FAT3	FAT atypical cadherin 3							0.598	-0.622516	TP53I11	tumor protein p53 inducible protein 11
0.418	0.875039	CDH6	cadherin 6							0.617	-0.121475	XIAP	X-linked inhibitor of apoptosis
0.419	0.227564	XIAP	X-linked inhibitor of apoptosis							0.637	-0.0772825	JMY	junction mediating and regulatory protein, p53 cofactor
0.422	0.286635	CELSR1	cadherin EGF LAG seven-pass G-type receptor 1							0.646	-0.0615716	MDM4	MDM4, p53 regulator
0.424	1.02795	CDH19	cadherin 19							0.648	-0.625367	CDH8	cadherin 8
0.448	0.96243	CDHR5	cadherin related family member 5							0.667	-0.158086	CDH6	cadherin 6
0.449	0.207961	TP53	tumor protein p53							0.678	-0.558416	CTNND2	catenin delta 2
0.491	0.495066	RUNX2	runt related transcription factor 2							0.705	-0.0513139	TP53BP1	tumor protein p53 binding protein 1
0.538	0.61152	RUNX2	runt related transcription factor 2							0.735	-0.442391	MMP2	matrix metallopeptidase 2
0.552	0.146893	CDH11	cadherin 11							0.743	-0.244456	SOX2-OT	SOX2 overlapping transcript
0.556	0.425385	CDH4	cadherin 4							0.783	-0.224275	CTNNA3	catenin alpha 3
0.568	0.129322	CELSR1	cadherin EGF LAG seven-pass G-type receptor 1							0.805	-0.0489587	CTNNAL1	catenin alpha like 1
0.589	0.251467	FAT2	FAT atypical cadherin 2							0.825	-0.10611	XAF1	XIAP associated factor 1
0.61	0.100728	CTNNB1	catenin beta 1							0.828	-0.0827065	CDH20	cadherin 20
0.625	0.138819	CDH11	cadherin 11							0.855	-0.0819897	DACT2	dishevelled binding antagonist of beta catenin 2
0.652	0.671248	CDH26	cadherin 26							0.901	-0.166276	TP53AIP1	tumor protein p53 regulated apoptosis inducing protein 1
0.684	0.386728	LOC100653137///CDH23	cadherin-23-like///cadherin-related 23							0.932	-0.0911222	CTNND2	catenin delta 2
0.698	0.0724033	CTNNBL1	catenin beta like 1							0.956	-0.0263819	CDH8	cadherin 8
0.729	0.460152	CDH26	cadherin 26							0.993	-0.00247834	CDH16	cadherin 16
0.742	0.161848	SOX2	SRY-box 2
0.767	0.0845375	BIRC5	baculoviral IAP repeat containing 5
0.79	0.513374	CDH1	cadherin 1
0.799	0.0730107	CTNNA1	catenin alpha 1
0.799	0.121341	CTNNA3	catenin alpha 3
0.805	0.19208	LINC-PINT	long intergenic non-protein coding RNA, p53 induced transcript
0.814	0.140194	MMP1	matrix metallopeptidase 1
0.859	0.127451	CDH19	cadherin 19
0.869	0.0411768	CDH13	cadherin 13
0.873	0.0312778	XIAP	X-linked inhibitor of apoptosis
0.895	0.0178145	MDM4	MDM4, p53 regulator
0.915	0.0279327	CDH11	cadherin 11
0.921	0.0781821	TP53	tumor protein p53
0.966	0.0117571	CDH24	cadherin 24
0.998	0.0005563	PDRG1	p53 and DNA damage regulated 1
