# Supplementary material for: Potential Anticancer Activity of Crude Ethanol, Ethyl Acetate, and Water Extracts of Ephedra foeminea on Human Osteosarcoma U2OS Cell Viability and Migration
Source: Biomed Res Int. 2020 Jul 9;2020:3837693. doi: 10.1155/2020/3837693 (PMC7368211; doi:10.1155/2020/3837693)
Supplement: Supplementary Materials — Figure S1. U2OS growth curve as determined over a 6-day period. The growth curve exhibited a sigmoid pattern with lag, exponential and statinary phases. Figure S2: Effect of E. foeminea ethyl acetate, ethanol and water extract treatments on U2OS cell morphology. Cells mostly possessed an elliptical shape in which they appeared wider at the center with tapering ends (red circles). Table S1. RT-PCR Forward (F) and Reverse (R) Primer Sequences, Annealing Temperature, Cycle Number and Amplicon Sizes.Table S2. Microarray Dataset Table S3. Summary of MTT assay Pvalues obtained for all extract treatments. Supplementary File 1.Fold change values of genes after doxorubicin treatment. Supplementary File 2.Fold change values of genes after nutlin treatment. [file 3837693.f1.zip › Supplementary File 2..xlsx]

## Sheet: DMSO vs Nutlin3
Upregulated										Downregulated
P.value	logFC	Gene.symbol	Gene.title							P.value	logFC	Gene.symbol	Gene.title
9.41e-07	2.95792	CDH10	cadherin 10							0.000372	-1.0412	SOX2	SRY-box 2
1.16e-06	2.53117	TP53INP1	tumor protein p53 inducible nuclear protein 1							0.000896	-0.891969	DCHS1	dachsous cadherin-related 1
3.37e-06	2.16233	TP53I3	tumor protein p53 inducible protein 3							0.00119	-1.02614	BIRC5	baculoviral IAP repeat containing 5
3.62e-05	1.44991	FAT3	FAT atypical cadherin 3							0.0012	-0.805872	CDH18	cadherin 18
7.34e-05	1.19362	BAX	BCL2 associated X, apoptosis regulator							0.0014	-0.945119	CDH12	cadherin 12
0.000133	1.1551	BAX	BCL2 associated X, apoptosis regulator							0.00164	-0.617732	DACT1	dishevelled binding antagonist of beta catenin 1
0.000168	1.14464	PIDD1	p53-induced death domain protein 1							0.00192	-1.74726	TWIST1	twist family bHLH transcription factor 1
0.000189	3.50103	TP53INP1	tumor protein p53 inducible nuclear protein 1							0.00229	-0.910597	BIRC5	baculoviral IAP repeat containing 5
0.000238	1.03961	PIDD1	p53-induced death domain protein 1							0.00239	-0.831101	BIRC5	baculoviral IAP repeat containing 5
0.000517	0.869563	LINC-PINT	long intergenic non-protein coding RNA, p53 induced transcript							0.00529	-0.922073	DCHS2	dachsous cadherin-related 2
0.000932	0.971125	CDIP1	cell death inducing p53 target 1							0.00626	-1.60222	DCHS1	dachsous cadherin-related 1
0.00166	1.10095	CDH22	cadherin 22							0.00674	-0.598415	FAT4	FAT atypical cadherin 4
0.00905	0.529253	XIAP	X-linked inhibitor of apoptosis							0.0209	-0.47239	CELSR2	cadherin EGF LAG seven-pass G-type receptor 2
0.0121	0.6092	CDH13	cadherin 13							0.0215	-0.433535	CDHR2	cadherin related family member 2
0.0133	0.411838	TWISTNB	TWIST neighbor							0.023	-0.382921	RUNX2	runt related transcription factor 2
0.0166	1.72801	TP53I11	tumor protein p53 inducible protein 11							0.0276	-1.37873	RUNX2	runt related transcription factor 2
0.0233	0.482376	JMY	junction mediating and regulatory protein, p53 cofactor							0.0277	-0.658645	DCHS2	dachsous cadherin-related 2
0.0249	0.43429	CDH11	cadherin 11							0.0304	-1.78773	LOC100653137///CDH23	cadherin-23-like///cadherin-related 23
0.0284	1.98504	CDH15	cadherin 15							0.0312	-1.39915	CDH6	cadherin 6
0.0325	2.20318	CDH16	cadherin 16							0.0336	-0.579886	CDH24	cadherin 24
0.0415	0.538597	CDIP1	cell death inducing p53 target 1							0.0367	-0.405873	CDH24	cadherin 24
0.0427	1.77346	CBY1	chibby family member 1, beta catenin antagonist							0.0404	-1.30794	RUNX2	runt related transcription factor 2
0.052	0.740623	SOX2	SRY-box 2							0.0504	-0.296297	TMX2-CTNND1///CTNND1	TMX2-CTNND1 readthrough (NMD candidate)///catenin delta 1
0.0625	0.414616	KLLN	killin, p53-regulated DNA replication inhibitor							0.0589	-0.34712	MDM4	MDM4, p53 regulator
0.0751	2.60635	CDH26	cadherin 26							0.0854	-0.27288	TP53	tumor protein p53
0.0768	0.23776	TMBIM4	transmembrane BAX inhibitor motif containing 4							0.0918	-1.80731	CDHR3	cadherin related family member 3
0.0776	0.410695	TP53AIP1	tumor protein p53 regulated apoptosis inducing protein 1							0.131	-1.46649	CELSR1	cadherin EGF LAG seven-pass G-type receptor 1
0.0907	0.278046	CTNNA1	catenin alpha 1							0.151	-0.28972	TMX2-CTNND1///CTNND1	TMX2-CTNND1 readthrough (NMD candidate)///catenin delta 1
0.0923	0.66488	XIAP	X-linked inhibitor of apoptosis							0.16	-0.336675	CELSR2	cadherin EGF LAG seven-pass G-type receptor 2
0.0995	0.459137	CDH1	cadherin 1							0.166	-0.979239	CDH17	cadherin 17
0.104	0.216291	TMBIM4	transmembrane BAX inhibitor motif containing 4							0.198	-0.915835	RUNX2	runt related transcription factor 2
0.106	1.65344	CDHR5	cadherin related family member 5							0.198	-0.516594	SOX2	SRY-box 2
0.114	0.302338	DACT3	dishevelled binding antagonist of beta catenin 3							0.199	-0.621241	DACT2	dishevelled binding antagonist of beta catenin 2
0.118	0.681899	CELSR1	cadherin EGF LAG seven-pass G-type receptor 1							0.204	-1.56833	CDH26	cadherin 26
0.119	0.191789	CTNNA1	catenin alpha 1							0.215	-0.691997	LOC100653137///CDH23	cadherin-23-like///cadherin-related 23
0.129	0.378057	FAT3	FAT atypical cadherin 3							0.281	-0.307875	CDH26	cadherin 26
0.13	0.970787	CDH15	cadherin 15							0.293	-0.160871	TMX2-CTNND1///CTNND1	TMX2-CTNND1 readthrough (NMD candidate)///catenin delta 1
0.132	0.306118	CTNND2	catenin delta 2							0.295	-0.248678	BIRC5	baculoviral IAP repeat containing 5
0.137	0.555166	XAF1	XIAP associated factor 1							0.3	-0.134365	CELSR3	cadherin EGF LAG seven-pass G-type receptor 3
0.142	0.270905	CDH4	cadherin 4							0.318	-0.204344	VIM	vimentin
0.144	0.478611	TP53AIP1	tumor protein p53 regulated apoptosis inducing protein 1							0.328	-0.126285	TP53BP2	tumor protein p53 binding protein 2
0.154	1.28032	XAF1	XIAP associated factor 1							0.345	-0.176248	TP53I13	tumor protein p53 inducible protein 13
0.155	1.67077	TP53AIP1	tumor protein p53 regulated apoptosis inducing protein 1							0.355	-0.120538	TP53BP1	tumor protein p53 binding protein 1
0.173	1.39662	CDHR1	cadherin related family member 1							0.372	-0.209262	XIAP	X-linked inhibitor of apoptosis
0.173	0.186151	CTNNB1	catenin beta 1							0.384	-0.770799	CELSR1	cadherin EGF LAG seven-pass G-type receptor 1
0.184	0.536235	CTNNBIP1	catenin beta interacting protein 1							0.389	-0.153962	CELSR3	cadherin EGF LAG seven-pass G-type receptor 3
0.214	0.194311	MDM4	MDM4, p53 regulator							0.395	-0.644989	FAT3	FAT atypical cadherin 3
0.217	0.213946	CTNNA1	catenin alpha 1							0.404	-0.144576	CPED1	cadherin like and PC-esterase domain containing 1
0.225	0.145683	CTNNBL1	catenin beta like 1							0.411	-0.150068	CDH2	cadherin 2
0.232	0.166791	CDH11	cadherin 11							0.414	-0.127888	TMBIM6	transmembrane BAX inhibitor motif containing 6
0.238	0.9701	CDH19	cadherin 19							0.423	-0.718295	CTNNA3	catenin alpha 3
0.243	0.138081	CTNNB1	catenin beta 1							0.427	-0.111973	TMX2-CTNND1///CTNND1	TMX2-CTNND1 readthrough (NMD candidate)///catenin delta 1
0.253	0.308397	MIR6513///TMBIM1	microRNA 6513///transmembrane BAX inhibitor motif containing 1							0.451	-0.807405	CDH19	cadherin 19
0.256	1.0576	SOX2	SRY-box 2							0.461	-0.370082	CDH8	cadherin 8
0.261	0.205674	XIAP	X-linked inhibitor of apoptosis							0.507	-0.217848	TP53BP1	tumor protein p53 binding protein 1
0.263	0.128922	TMBIM4	transmembrane BAX inhibitor motif containing 4							0.51	-0.135546	MDM4	MDM4, p53 regulator
0.265	0.738826	RUNX2	runt related transcription factor 2							0.53	-0.214615	CDH8	cadherin 8
0.268	1.25632	CTNND2	catenin delta 2							0.545	-0.690026	CTNNA3	catenin alpha 3
0.28	0.177409	TMBIM4	transmembrane BAX inhibitor motif containing 4							0.555	-0.230937	TP53I11	tumor protein p53 inducible protein 11
0.281	0.120053	CTNNA1	catenin alpha 1							0.557	-0.087799	CBY1	chibby family member 1, beta catenin antagonist
0.286	1.2644	CDH7	cadherin 7							0.565	-0.481271	MMP2	matrix metallopeptidase 2
0.288	1.44412	CDH5	cadherin 5							0.605	-0.248322	CDH9	cadherin 9
0.302	0.353742	LINC-PINT	long intergenic non-protein coding RNA, p53 induced transcript							0.612	-0.175169	CDH8	cadherin 8
0.312	0.860102	CDH4	cadherin 4							0.627	-0.130602	CDH11	cadherin 11
0.348	1.1033	CDH26	cadherin 26							0.639	-0.0728845	FAT1	FAT atypical cadherin 1
0.366	0.214065	MDM4	MDM4, p53 regulator							0.658	-0.558312	CTNNA3	catenin alpha 3
0.388	0.888911	MMP2	matrix metallopeptidase 2							0.659	-0.353634	CDH6	cadherin 6
0.42	0.357771	CDH4	cadherin 4							0.693	-0.0646732	TWISTNB	TWIST neighbor
0.443	0.206123	CDH11	cadherin 11							0.719	-0.362125	TP53BP1	tumor protein p53 binding protein 1
0.463	1.01909	CDH1	cadherin 1							0.737	-0.228909	CDH6	cadherin 6
0.473	0.424733	CDH7	cadherin 7							0.744	-0.251873	LOC100653137///CDH23	cadherin-23-like///cadherin-related 23
0.477	0.240608	CTNNB1	catenin beta 1							0.752	-0.0631735	XIAP	X-linked inhibitor of apoptosis
0.481	0.680559	FAT2	FAT atypical cadherin 2							0.763	-0.0346353	MMP2	matrix metallopeptidase 2
0.504	0.918279	SOX2-OT	SOX2 overlapping transcript							0.772	-0.0382206	PDRG1	p53 and DNA damage regulated 1
0.508	0.740064	LINC-PINT	long intergenic non-protein coding RNA, p53 induced transcript							0.797	-0.109725	CDHR1	cadherin related family member 1
0.512	0.597832	CDH22	cadherin 22							0.813	-0.144924	CTNNA1P1	catenin alpha 1 pseudogene 1
0.514	0.534872	CDHR3	cadherin related family member 3							0.865	-0.127327	CDH20	cadherin 20
0.524	0.436962	CDH6	cadherin 6							0.875	-0.114494	XAF1	XIAP associated factor 1
0.556	0.391497	TWIST2	twist family bHLH transcription factor 2							0.906	-0.077298	TP53I11	tumor protein p53 inducible protein 11
0.59	0.531347	CTNNA3	catenin alpha 3							0.918	-0.0157596	JMY	junction mediating and regulatory protein, p53 cofactor
0.597	0.0753166	TMBIM6	transmembrane BAX inhibitor motif containing 6							0.952	-0.033065	CDH6	cadherin 6
0.614	0.155651	CTNND2	catenin delta 2							0.986	-0.0040225	CDH2	cadherin 2
0.622	0.181802	CDH3	cadherin 3
0.626	0.137291	CDH8	cadherin 8
0.628	0.267685	CDHR5	cadherin related family member 5
0.658	0.110561	CPED1	cadherin like and PC-esterase domain containing 1
0.659	0.578788	TP53INP1	tumor protein p53 inducible nuclear protein 1
0.662	0.0766497	MDM4	MDM4, p53 regulator
0.674	0.281732	MMP1	matrix metallopeptidase 1
0.687	0.107341	CDHR5	cadherin related family member 5
0.704	0.120966	CTNNA2	catenin alpha 2
0.705	0.0480225	CTNNAL1	catenin alpha like 1
0.713	0.0666848	CDH4	cadherin 4
0.725	0.221052	LINC-PINT	long intergenic non-protein coding RNA, p53 induced transcript
0.739	0.41043	CDH19	cadherin 19
0.744	0.0647622	CTNNA1	catenin alpha 1
0.758	0.0488456	TP53INP2	tumor protein p53 inducible nuclear protein 2
0.77	0.163091	LOC100653137///CDH23	cadherin-23-like///cadherin-related 23
0.789	0.0835051	TP53	tumor protein p53
0.795	0.271089	CDH6	cadherin 6
0.803	0.0299378	XIAP	X-linked inhibitor of apoptosis
0.809	0.0498222	TWIST2	twist family bHLH transcription factor 2
0.833	0.186925	DACT3	dishevelled binding antagonist of beta catenin 3
0.835	0.0276626	VIM	vimentin
0.874	0.172384	RUNX2	runt related transcription factor 2
0.916	0.103756	TP53AIP1	tumor protein p53 regulated apoptosis inducing protein 1
0.932	0.0106514	TP53BP1	tumor protein p53 binding protein 1
0.955	0.0091258	MDM4	MDM4, p53 regulator
0.985	0.0026189	XIAP	X-linked inhibitor of apoptosis
